# Supplementary material for: Factors Affecting Thanatosis in the Braconid Parasitoid Wasp Heterospilus prosopidis
Source: MDPI journal article supplement (doi:10.3390/insects12010048), 2021-01-10
Supplement: s1 [file s1]

**Table S2.** Generalized linear models for the effects of temperature and age on the frequency and duration of thanatosis in male *H. prosopidis*. The reference group (intercept) is 2-d-old individuals at 25°C in models of both frequency and duration.

|                                    | $\beta$ (mean $\pm$ SE) | z-value | <i>p</i> |
|------------------------------------|-------------------------|---------|----------|
| (a) Model for effects on frequency |                         |         |          |
| Intercept                          | 0.49 $\pm$ 0.29         | 1.680   | 0.093    |
| 18°C                               | -0.28 $\pm$ 0.41        | -0.696  | 0.486    |
| 0-d old                            | 1.09 $\pm$ 0.49         | 2.255   | 0.024    |
| 18°C $\times$ 0-d old              | 0.28 $\pm$ 0.68         | 0.416   | 0.678    |
| (b) Model for effects on duration  |                         |         |          |
| Intercept                          | 833 $\pm$ 259           | 3.219   | 0.002    |
| 18°C                               | 296 $\pm$ 379           | 0.780   | 0.437    |
| 0-d old                            | -32 $\pm$ 347           | -0.092  | 0.927    |
| 18°C $\times$ 0-d old              | -4 $\pm$ 500            | -0.008  | 0.994    |

**Table S3.** Generalized linear models for the effects of temperature and age on the frequency and duration of thanatosis in female *H. prosopidis*. The reference group (intercept) is 2-d-old individuals at 25°C in models of both frequency and duration.

|                                    | $\beta$ (mean $\pm$ SE) | z-value | <i>p</i> |
|------------------------------------|-------------------------|---------|----------|
| (a) Model for effects on frequency |                         |         |          |
| Intercept                          | 0.69 $\pm$ 0.33         | 2.118   | 0.034    |
| 18°C                               | 0.56 $\pm$ 0.49         | 1.153   | 0.249    |
| 0-d old                            | 0.30 $\pm$ 0.46         | 0.645   | 0.519    |
| 18°C $\times$ 0-d old              | 0.55 $\pm$ 0.75         | 0.737   | 0.461    |
| (b) Model for effects on duration  |                         |         |          |
| Intercept                          | 4408 $\pm$ 798          | 5.523   | <0.001   |
| 18°C                               | −1474 $\pm$ 1071        | −1.377  | 0.171    |
| 0-d old                            | −1800 $\pm$ 1071        | −1.681  | 0.095    |
| 18°C $\times$ 0-d old              | −411 $\pm$ 1466         | 0.284   | 0.777    |
