# Supplementary material for: Factors Affecting Thanatosis in the Braconid Parasitoid Wasp Heterospilus prosopidis
Source: Insects. 2021 Jan 10;12(1):48. doi: 10.3390/insects12010048 (PMC7826778; doi:10.3390/insects12010048)
Supplement: Supplementary file 1 [file insects-12-00048-s001.zip › insects-1062417-TableS1-xml.csv]

Table S1. Raw data of the experiments.
sex	temp	color	thana	time	old		sex: female, female; _male, male
female	Ltemp	_white	1	1750	0dold		temp, Ltemp, 18��C; _Htemp, 25��C
female	Ltemp	_white	1	490	0dold		color: _white, white background color; brown, brown background color; green, green background color
female	Ltemp	_white	1	744	0dold		thana: 0, thanatosis induced; 1, thanatosis not induced
female	Ltemp	_white	1	825	0dold		time: thanatosis duration measured by the number of frames
female	Ltemp	_white	1	472	0dold		old: 0old, 0-d old; _48dold, 2-d old
female	Ltemp	_white	1	7531	0dold
female	Ltemp	_white	1	2365	0dold
female	Ltemp	_white	0	NA	0dold
female	Ltemp	_white	1	1004	0dold
female	Ltemp	_white	1	1425	0dold
_male	Ltemp	_white	1	187	0dold
_male	Ltemp	_white	1	2537	0dold
_male	Ltemp	_white	1	669	0dold
_male	Ltemp	_white	1	375	0dold
_male	Ltemp	_white	1	153	0dold
_male	Ltemp	_white	1	745	0dold
_male	Ltemp	_white	1	461	0dold
_male	Ltemp	_white	1	989	0dold
_male	Ltemp	_white	1	2754	0dold
_male	Ltemp	_white	1	903	0dold
_male	Ltemp	_white	1	1270	0dold
_male	Ltemp	_white	1	855	0dold
_male	Ltemp	_white	1	1629	0dold
_male	Ltemp	_white	1	632	0dold
_male	Ltemp	_white	0	NA	0dold
_male	Ltemp	_white	1	879	0dold
_male	Ltemp	_white	1	2458	0dold
_male	Ltemp	_white	1	1085	0dold
_male	Ltemp	_white	1	2831	0dold
_male	Ltemp	_white	1	1564	0dold
female	Ltemp	_white	1	3623	0dold
_male	Ltemp	_white	1	647	0dold
_male	Ltemp	_white	1	492	0dold
female	Ltemp	_white	1	655	0dold
_male	Ltemp	_white	0	NA	0dold
_male	Ltemp	_white	1	1373	0dold
female	Ltemp	_white	1	108	0dold
female	Ltemp	_white	1	1320	0dold
female	Ltemp	_white	1	5233	0dold
_male	Ltemp	_white	1	1637	0dold
female	Ltemp	_white	1	582	0dold
female	Ltemp	_white	1	2112	0dold
_male	Ltemp	_white	1	526	0dold
female	Ltemp	_white	1	230	0dold
female	Ltemp	_white	1	632	0dold
female	Ltemp	_white	1	1329	0dold
female	Ltemp	_white	1	704	0dold
_male	Ltemp	_white	0	NA	0dold
_male	Ltemp	_white	0	NA	0dold
_male	Ltemp	_white	1	599	0dold
female	Ltemp	_white	1	981	0dold
female	Ltemp	_white	1	2300	0dold
_male	Ltemp	_white	1	590	0dold
female	Ltemp	_white	1	2322	0dold
_male	Ltemp	_white	1	1867	0dold
female	Ltemp	_white	1	2095	0dold
_male	Ltemp	_white	1	4419	0dold
female	Ltemp	_white	1	2019	0dold
female	Ltemp	_white	1	2776	0dold
female	Ltemp	_white	1	685	0dold
female	Ltemp	_white	1	435	0dold
_male	Ltemp	_white	0	NA	0dold
_male	Ltemp	_white	1	817	0dold
_male	Ltemp	_white	0	NA	0dold
_male	Ltemp	_white	1	308	0dold
female	Ltemp	_white	1	572	0dold
_male	Ltemp	_white	0	NA	0dold
_male	Ltemp	_white	1	495	0dold
_male	Ltemp	_white	1	373	0dold
female	Ltemp	_white	1	976	0dold
female	Ltemp	_white	1	2501	0dold
female	Ltemp	_white	1	1997	0dold
female	Ltemp	_white	1	519	0dold
female	Ltemp	_white	1	2548	0dold
female	Ltemp	_white	1	1189	0dold
female	Ltemp	_white	1	893	0dold
female	Ltemp	_white	1	1075	0dold
female	Ltemp	_white	1	1213	0dold
female	Ltemp	_white	1	967	0dold
female	Ltemp	_white	1	624	0dold
_male	Ltemp	_white	1	312	0dold
_male	Ltemp	_white	1	250	0dold
_male	Ltemp	_white	1	1209	0dold
_male	Ltemp	_white	0	NA	0dold
female	Ltemp	_white	0	NA	0dold
female	Ltemp	_white	1	1554	0dold
female	Ltemp	_white	0	NA	0dold
female	Ltemp	_white	0	NA	0dold
female	Ltemp	_white	0	NA	0dold
_male	Ltemp	_white	1	695	0dold
_male	Ltemp	_white	1	567	0dold
_male	Ltemp	_white	1	1133	0dold
_male	Ltemp	_white	1	1338	0dold
_male	Ltemp	_white	0	NA	_48dold
female	Ltemp	_white	1	208	_48dold
female	Ltemp	_white	1	729	_48dold
female	Ltemp	_white	1	758	_48dold
female	Ltemp	_white	1	9680	_48dold
female	Ltemp	_white	0	NA	_48dold
female	Ltemp	_white	0	NA	_48dold
female	Ltemp	_white	1	521	_48dold
female	Ltemp	_white	1	510	_48dold
female	Ltemp	_white	1	430	_48dold
female	Ltemp	_white	1	1776	_48dold
_male	Ltemp	_white	1	1643	_48dold
_male	Ltemp	_white	1	670	_48dold
_male	Ltemp	_white	0	NA	_48dold
_male	Ltemp	_white	1	623	_48dold
_male	Ltemp	_white	0	NA	_48dold
_male	Ltemp	_white	0	NA	_48dold
_male	Ltemp	_white	1	709	_48dold
_male	Ltemp	_white	1	827	_48dold
_male	Ltemp	_white	0	NA	_48dold
_male	Ltemp	_white	1	397	_48dold
_male	Ltemp	_white	1	523	_48dold
_male	Ltemp	_white	1	124	_48dold
_male	Ltemp	_white	0	NA	_48dold
_male	Ltemp	_white	1	1483	_48dold
female	Ltemp	_white	1	502	_48dold
female	Ltemp	_white	1	28	_48dold
_male	Ltemp	_white	0	NA	_48dold
_male	Ltemp	_white	0	NA	_48dold
_male	Ltemp	_white	1	3362	_48dold
_male	Ltemp	_white	1	233	_48dold
female	Ltemp	_white	0	NA	_48dold
female	Ltemp	_white	1	1641	_48dold
female	Ltemp	_white	1	510	_48dold
female	Ltemp	_white	1	763	_48dold
female	Ltemp	_white	1	92	_48dold
female	Ltemp	_white	1	105	_48dold
female	Ltemp	_white	1	117	_48dold
female	Ltemp	_white	1	509	_48dold
female	Ltemp	_white	0	NA	_48dold
female	Ltemp	_white	1	5243	_48dold
female	Ltemp	_white	1	506	_48dold
female	Ltemp	_white	0	NA	_48dold
female	Ltemp	_white	1	12378	_48dold
female	Ltemp	_white	1	293	_48dold
female	Ltemp	_white	1	507	_48dold
female	Ltemp	_white	1	738	_48dold
female	Ltemp	_white	1	546	_48dold
female	Ltemp	_white	1	36	_48dold
female	Ltemp	_white	0	NA	_48dold
female	Ltemp	_white	0	NA	_48dold
female	Ltemp	_white	0	NA	_48dold
female	Ltemp	_white	1	7075	_48dold
female	Ltemp	_white	1	2255	_48dold
female	Ltemp	_white	1	1546	_48dold
female	Ltemp	_white	1	2525	_48dold
female	Ltemp	_white	1	11646	_48dold
female	Ltemp	_white	1	18725	_48dold
female	Ltemp	_white	0	NA	_48dold
female	Ltemp	_white	1	1136	_48dold
female	Ltemp	_white	0	NA	_48dold
female	Ltemp	_white	1	481	_48dold
female	Ltemp	_white	1	16327	_48dold
female	Ltemp	_white	1	1849	_48dold
_male	Ltemp	_white	1	12904	_48dold
_male	Ltemp	_white	0	NA	_48dold
_male	Ltemp	_white	0	NA	_48dold
_male	Ltemp	_white	1	701	_48dold
_male	Ltemp	_white	1	426	_48dold
_male	Ltemp	_white	0	NA	_48dold
_male	Ltemp	_white	1	1249	_48dold
_male	Ltemp	_white	0	NA	_48dold
_male	Ltemp	_white	0	NA	_48dold
_male	Ltemp	_white	0	NA	_48dold
_male	Ltemp	_white	1	507	_48dold
_male	Ltemp	_white	0	NA	_48dold
_male	Ltemp	_white	1	417	_48dold
_male	Ltemp	_white	0	NA	_48dold
female	Ltemp	green	1	1335	0dold
female	Ltemp	green	1	1526	0dold
female	Ltemp	green	1	790	0dold
female	Ltemp	green	1	432	0dold
female	Ltemp	green	1	1822	0dold
female	Ltemp	green	1	1135	0dold
female	Ltemp	green	1	2416	0dold
female	_Htemp	_white	1	858	_48dold
female	_Htemp	_white	0	NA	_48dold
female	_Htemp	_white	1	763	_48dold
female	_Htemp	_white	1	1453	_48dold
female	_Htemp	_white	1	900	_48dold
female	_Htemp	_white	1	577	_48dold
female	_Htemp	_white	0	NA	_48dold
female	_Htemp	_white	1	1294	_48dold
female	_Htemp	_white	0	NA	_48dold
female	_Htemp	_white	0	NA	_48dold
female	_Htemp	_white	1	565	_48dold
female	_Htemp	_white	1	808	_48dold
female	_Htemp	_white	1	4061	_48dold
female	_Htemp	_white	1	6446	_48dold
female	_Htemp	_white	1	1717	_48dold
female	_Htemp	_white	0	NA	_48dold
female	_Htemp	_white	1	1696	_48dold
female	_Htemp	_white	0	NA	_48dold
female	_Htemp	_white	1	499	_48dold
female	_Htemp	_white	1	1109	_48dold
female	_Htemp	_white	1	977	_48dold
female	_Htemp	_white	0	NA	_48dold
female	_Htemp	_white	1	16226	_48dold
female	_Htemp	_white	1	28290	_48dold
female	_Htemp	_white	0	NA	_48dold
female	Ltemp	green	1	1893	0dold
_male	Ltemp	_white	1	195	_48dold
_male	Ltemp	_white	0	NA	_48dold
_male	Ltemp	_white	0	NA	_48dold
_male	Ltemp	_white	1	657	_48dold
_male	Ltemp	_white	1	379	_48dold
_male	Ltemp	_white	1	629	_48dold
_male	Ltemp	_white	0	NA	_48dold
_male	Ltemp	_white	1	1045	_48dold
_male	Ltemp	_white	1	326	_48dold
_male	Ltemp	_white	0	NA	_48dold
_male	Ltemp	_white	1	57	_48dold
_male	Ltemp	_white	0	NA	_48dold
_male	Ltemp	_white	1	120	_48dold
_male	Ltemp	_white	0	NA	_48dold
_male	Ltemp	_white	1	136	_48dold
_male	Ltemp	_white	1	132	_48dold
female	Ltemp	green	1	1608	0dold
female	Ltemp	green	1	1673	0dold
female	Ltemp	green	1	3072	0dold
female	Ltemp	green	1	1172	0dold
female	Ltemp	green	1	2518	0dold
female	Ltemp	green	1	3032	0dold
female	Ltemp	green	1	1049	0dold
female	Ltemp	green	1	735	0dold
female	Ltemp	green	1	779	0dold
female	Ltemp	green	1	977	0dold
female	Ltemp	green	1	1609	0dold
female	Ltemp	green	1	2552	0dold
female	Ltemp	green	1	1104	0dold
female	Ltemp	green	1	5395	0dold
female	Ltemp	green	1	1031	0dold
female	Ltemp	green	1	727	0dold
female	Ltemp	green	1	561	0dold
female	Ltemp	green	1	2253	0dold
female	Ltemp	green	1	2324	0dold
female	Ltemp	green	1	2044	0dold
female	Ltemp	green	1	1099	0dold
female	Ltemp	green	1	732	0dold
female	Ltemp	green	1	800	0dold
female	Ltemp	green	1	606	0dold
female	Ltemp	green	1	7115	0dold
female	Ltemp	green	1	2333	0dold
female	Ltemp	green	1	450	0dold
female	Ltemp	green	1	240	0dold
female	Ltemp	green	1	1103	0dold
female	Ltemp	green	1	576	0dold
female	Ltemp	green	1	627	0dold
female	Ltemp	green	1	347	0dold
female	Ltemp	green	1	427	0dold
female	Ltemp	green	1	382	0dold
female	Ltemp	green	1	1423	0dold
female	Ltemp	green	1	708	0dold
female	Ltemp	green	1	2252	0dold
female	Ltemp	green	1	2815	0dold
female	Ltemp	green	1	530	0dold
female	Ltemp	green	1	824	0dold
female	Ltemp	green	1	344	0dold
female	Ltemp	green	1	899	0dold
female	Ltemp	brown	1	3522	0dold
female	Ltemp	brown	1	1345	0dold
female	Ltemp	brown	1	1032	0dold
female	Ltemp	brown	1	1151	0dold
female	Ltemp	brown	1	1644	0dold
female	Ltemp	brown	1	803	0dold
female	Ltemp	brown	1	195	0dold
female	Ltemp	brown	1	604	0dold
female	Ltemp	brown	1	769	0dold
female	Ltemp	brown	0	NA	0dold
female	Ltemp	brown	1	1053	0dold
female	Ltemp	brown	1	1440	0dold
female	Ltemp	brown	1	251	0dold
female	Ltemp	brown	1	2146	0dold
female	Ltemp	brown	1	922	0dold
female	Ltemp	brown	1	1434	0dold
female	Ltemp	brown	1	429	0dold
_male	_Htemp	_white	0	NA	_48dold
_male	_Htemp	_white	1	2582	_48dold
_male	_Htemp	_white	1	1453	_48dold
_male	_Htemp	_white	1	880	_48dold
_male	_Htemp	_white	0	NA	_48dold
_male	_Htemp	_white	0	NA	_48dold
_male	_Htemp	_white	1	353	_48dold
_male	_Htemp	_white	1	599	_48dold
_male	_Htemp	_white	1	438	_48dold
_male	_Htemp	_white	1	757	_48dold
_male	_Htemp	_white	1	424	_48dold
_male	_Htemp	_white	1	355	_48dold
_male	_Htemp	_white	1	608	_48dold
_male	_Htemp	_white	0	NA	_48dold
_male	_Htemp	_white	0	NA	_48dold
_male	_Htemp	_white	1	80	_48dold
_male	_Htemp	_white	1	573	_48dold
_male	_Htemp	_white	1	544	_48dold
_male	_Htemp	_white	0	NA	_48dold
_male	_Htemp	_white	0	NA	_48dold
female	Ltemp	brown	1	3354	0dold
female	Ltemp	brown	1	368	0dold
female	Ltemp	brown	1	2650	0dold
female	Ltemp	brown	1	1436	0dold
female	Ltemp	brown	1	247	0dold
female	Ltemp	brown	1	889	0dold
female	Ltemp	brown	1	2570	0dold
female	Ltemp	brown	1	468	0dold
female	Ltemp	brown	1	539	0dold
female	Ltemp	brown	1	5070	0dold
female	Ltemp	brown	1	5798	0dold
female	Ltemp	brown	1	856	0dold
female	Ltemp	brown	1	328	0dold
female	Ltemp	brown	1	1500	0dold
female	Ltemp	brown	1	110	0dold
female	Ltemp	brown	1	1349	0dold
female	Ltemp	brown	1	1087	0dold
female	Ltemp	brown	1	1507	0dold
female	Ltemp	brown	1	808	0dold
female	Ltemp	brown	1	514	0dold
_male	_Htemp	_white	1	703	_48dold
_male	_Htemp	_white	1	359	_48dold
_male	_Htemp	_white	0	NA	_48dold
_male	_Htemp	_white	1	446	_48dold
_male	_Htemp	_white	0	NA	_48dold
_male	_Htemp	_white	0	NA	_48dold
female	Ltemp	brown	1	823	0dold
female	Ltemp	brown	1	473	0dold
female	Ltemp	brown	1	892	0dold
female	Ltemp	brown	1	867	0dold
female	Ltemp	brown	1	452	0dold
female	Ltemp	brown	1	2296	0dold
female	Ltemp	brown	1	1082	0dold
female	Ltemp	brown	1	590	0dold
female	Ltemp	brown	1	66	0dold
female	Ltemp	brown	1	270	0dold
_male	_Htemp	_white	1	494	_48dold
female	Ltemp	brown	1	11761	0dold
female	Ltemp	brown	1	798	0dold
female	Ltemp	brown	1	340	0dold
female	Ltemp	brown	1	157	0dold
female	Ltemp	brown	1	252	0dold
female	Ltemp	brown	1	308	0dold
female	Ltemp	brown	0	NA	0dold
female	Ltemp	brown	1	745	0dold
female	Ltemp	brown	1	2255	0dold
female	Ltemp	brown	0	NA	0dold
female	Ltemp	brown	0	NA	0dold
female	Ltemp	brown	1	259	0dold
female	Ltemp	brown	1	561	0dold
female	Ltemp	brown	1	743	0dold
female	Ltemp	brown	1	926	0dold
female	Ltemp	brown	1	952	0dold
female	Ltemp	brown	0	NA	0dold
_male	_Htemp	_white	1	694	_48dold
_male	_Htemp	_white	0	NA	_48dold
_male	_Htemp	_white	1	498	_48dold
_male	_Htemp	_white	0	NA	_48dold
_male	_Htemp	_white	0	NA	_48dold
_male	_Htemp	_white	1	679	_48dold
_male	_Htemp	_white	0	NA	_48dold
_male	_Htemp	_white	1	188	_48dold
_male	_Htemp	_white	0	NA	_48dold
_male	_Htemp	_white	1	891	_48dold
_male	_Htemp	_white	1	101	_48dold
_male	_Htemp	_white	1	612	_48dold
_male	_Htemp	_white	1	1251	_48dold
_male	_Htemp	_white	1	5449	_48dold
_male	_Htemp	_white	1	597	_48dold
_male	_Htemp	_white	1	325	_48dold
_male	_Htemp	_white	1	1316	_48dold
_male	_Htemp	_white	0	NA	_48dold
_male	_Htemp	_white	1	683	_48dold
_male	_Htemp	_white	0	NA	_48dold
_male	_Htemp	_white	0	NA	_48dold
_male	_Htemp	_white	1	887	_48dold
_male	_Htemp	_white	0	NA	_48dold
_male	_Htemp	_white	0	NA	0dold
_male	_Htemp	_white	1	476	0dold
_male	_Htemp	_white	1	109	0dold
female	_Htemp	_white	1	1494	_48dold
female	_Htemp	_white	0	NA	_48dold
female	_Htemp	_white	1	14732	_48dold
female	_Htemp	_white	1	24	_48dold
female	_Htemp	_white	0	NA	_48dold
female	_Htemp	_white	0	NA	_48dold
female	_Htemp	_white	1	15500	_48dold
female	_Htemp	_white	1	460	_48dold
female	_Htemp	_white	0	NA	_48dold
female	_Htemp	_white	1	769	_48dold
female	_Htemp	_white	0	NA	_48dold
female	_Htemp	_white	1	2906	_48dold
female	_Htemp	_white	1	8217	_48dold
female	_Htemp	_white	1	8901	_48dold
female	_Htemp	_white	0	NA	_48dold
female	_Htemp	_white	1	1085	_48dold
female	_Htemp	_white	1	1100	_48dold
female	_Htemp	_white	0	NA	0dold
female	_Htemp	_white	0	NA	0dold
female	_Htemp	_white	1	7756	0dold
female	_Htemp	_white	1	1064	0dold
female	_Htemp	_white	1	376	0dold
female	_Htemp	_white	1	6866	0dold
female	_Htemp	_white	1	8554	0dold
_male	_Htemp	_white	1	408	0dold
_male	_Htemp	_white	1	250	0dold
female	_Htemp	_white	0	NA	0dold
female	_Htemp	_white	1	665	0dold
female	_Htemp	_white	0	NA	0dold
female	_Htemp	_white	1	1563	0dold
female	_Htemp	_white	1	2759	0dold
female	_Htemp	_white	1	2865	0dold
female	_Htemp	_white	1	920	0dold
female	_Htemp	_white	1	885	0dold
female	_Htemp	_white	1	2651	0dold
female	_Htemp	_white	1	17	0dold
female	_Htemp	_white	1	1186	0dold
_male	_Htemp	_white	1	1095	0dold
_male	_Htemp	_white	1	744	0dold
_male	_Htemp	_white	0	NA	0dold
_male	_Htemp	_white	0	NA	0dold
_male	_Htemp	_white	1	447	0dold
_male	_Htemp	_white	1	60	0dold
_male	_Htemp	_white	1	378	0dold
_male	_Htemp	_white	1	529	0dold
_male	_Htemp	_white	1	31	0dold
_male	_Htemp	_white	0	NA	0dold
_male	_Htemp	_white	1	671	0dold
_male	_Htemp	_white	1	404	0dold
_male	_Htemp	_white	1	1041	0dold
_male	_Htemp	_white	1	461	0dold
_male	_Htemp	_white	1	355	0dold
_male	_Htemp	_white	1	205	0dold
_male	_Htemp	_white	1	133	0dold
_male	_Htemp	_white	1	590	0dold
_male	_Htemp	_white	1	439	0dold
_male	_Htemp	_white	1	1328	0dold
_male	_Htemp	_white	1	1159	0dold
_male	_Htemp	_white	1	443	0dold
_male	_Htemp	_white	1	1285	0dold
_male	_Htemp	_white	1	496	0dold
_male	_Htemp	_white	1	331	0dold
_male	_Htemp	_white	1	500	0dold
_male	_Htemp	_white	1	515	0dold
_male	_Htemp	_white	1	343	0dold
female	_Htemp	_white	1	1937	0dold
female	_Htemp	_white	0	NA	0dold
female	_Htemp	_white	1	1916	0dold
female	_Htemp	_white	1	3496	0dold
female	_Htemp	_white	1	172	0dold
female	_Htemp	_white	1	2385	0dold
female	_Htemp	_white	1	539	0dold
female	_Htemp	_white	1	458	0dold
female	_Htemp	_white	0	NA	0dold
_male	_Htemp	_white	1	1542	0dold
_male	_Htemp	_white	1	279	0dold
_male	_Htemp	_white	1	217	0dold
_male	_Htemp	_white	1	601	0dold
_male	_Htemp	_white	0	NA	0dold
_male	_Htemp	_white	1	676	0dold
_male	_Htemp	_white	1	1994	0dold
_male	_Htemp	_white	1	2305	0dold
_male	_Htemp	_white	1	7719	0dold
female	_Htemp	_white	0	NA	0dold
female	_Htemp	_white	0	NA	0dold
female	_Htemp	_white	0	NA	0dold
female	_Htemp	_white	0	NA	0dold
female	_Htemp	_white	1	815	0dold
female	_Htemp	_white	1	1768	0dold
female	_Htemp	_white	0	NA	0dold
female	_Htemp	_white	1	11353	0dold
female	_Htemp	_white	1	2322	0dold
female	_Htemp	_white	1	10423	0dold
female	_Htemp	_white	1	1049	0dold
female	_Htemp	_white	1	2208	0dold
female	_Htemp	_white	1	698	0dold
female	_Htemp	_white	1	530	0dold
female	_Htemp	_white	0	NA	0dold
female	_Htemp	_white	1	1093	0dold
female	_Htemp	_white	0	NA	0dold
female	_Htemp	_white	1	289	0dold
female	_Htemp	_white	1	7664	0dold
female	_Htemp	_white	1	894	0dold
female	_Htemp	_white	1	1163	0dold
_male	_Htemp	_white	0	NA	0dold
_male	_Htemp	_white	0	NA	0dold
_male	_Htemp	_white	1	73	0dold
_male	_Htemp	_white	1	612	0dold
_male	_Htemp	_white	0	NA	0dold
female	_Htemp	green	1	1036	_48dold
female	_Htemp	green	0	NA	_48dold
female	_Htemp	green	1	1096	_48dold
female	_Htemp	green	1	8020	_48dold
female	_Htemp	green	1	4391	_48dold
female	_Htemp	green	1	822	_48dold
female	_Htemp	green	1	157	_48dold
female	_Htemp	green	0	NA	_48dold
female	_Htemp	green	0	NA	_48dold
female	_Htemp	green	0	NA	_48dold
female	_Htemp	green	1	327	_48dold
female	_Htemp	green	1	4371	_48dold
female	_Htemp	green	1	594	_48dold
female	_Htemp	green	1	6589	_48dold
female	_Htemp	green	0	NA	_48dold
female	_Htemp	green	1	1174	_48dold
female	_Htemp	green	1	579	_48dold
female	_Htemp	green	0	NA	_48dold
female	_Htemp	green	1	950	_48dold
female	_Htemp	green	0	NA	_48dold
female	_Htemp	green	0	NA	_48dold
female	_Htemp	green	1	686	_48dold
female	_Htemp	green	1	604	_48dold
female	_Htemp	green	1	838	_48dold
female	_Htemp	green	1	403	_48dold
female	_Htemp	green	0	NA	_48dold
female	_Htemp	green	1	914	_48dold
female	_Htemp	green	1	326	_48dold
female	_Htemp	green	1	1232	_48dold
female	_Htemp	green	1	1042	_48dold
female	_Htemp	green	1	4687	_48dold
female	_Htemp	green	1	415	_48dold
female	_Htemp	green	1	6914	_48dold
female	_Htemp	green	1	457	_48dold
female	_Htemp	green	1	1957	_48dold
female	_Htemp	green	1	200	_48dold
female	_Htemp	green	1	726	_48dold
female	_Htemp	green	1	839	_48dold
female	_Htemp	green	1	1659	_48dold
female	_Htemp	green	1	227	_48dold
female	_Htemp	green	1	210	_48dold
female	_Htemp	green	1	1177	_48dold
female	_Htemp	green	0	NA	_48dold
female	_Htemp	green	1	397	_48dold
female	_Htemp	green	0	NA	_48dold
female	_Htemp	green	1	12970	_48dold
female	_Htemp	green	0	NA	_48dold
female	_Htemp	brown	1	951	_48dold
female	_Htemp	brown	1	530	_48dold
female	_Htemp	brown	1	750	_48dold
female	_Htemp	brown	0	NA	_48dold
female	_Htemp	brown	1	1537	_48dold
female	_Htemp	brown	1	464	_48dold
female	_Htemp	brown	1	703	_48dold
female	_Htemp	brown	0	NA	_48dold
female	_Htemp	brown	0	NA	_48dold
female	_Htemp	brown	1	69	_48dold
female	_Htemp	brown	0	NA	_48dold
female	_Htemp	brown	1	22370	_48dold
female	_Htemp	brown	1	782	_48dold
female	_Htemp	brown	1	1314	_48dold
female	_Htemp	brown	1	1004	_48dold
female	_Htemp	brown	1	438	_48dold
female	_Htemp	brown	0	NA	_48dold
female	_Htemp	brown	0	NA	_48dold
female	_Htemp	brown	1	6991	_48dold
female	_Htemp	brown	0	NA	_48dold
female	_Htemp	brown	1	253	_48dold
female	_Htemp	brown	1	1097	_48dold
female	_Htemp	brown	0	NA	_48dold
female	_Htemp	brown	1	1437	_48dold
female	_Htemp	brown	1	612	_48dold
female	_Htemp	brown	0	NA	_48dold
female	_Htemp	brown	1	2020	_48dold
female	_Htemp	brown	1	857	_48dold
female	_Htemp	brown	0	NA	_48dold
female	_Htemp	brown	0	NA	_48dold
female	_Htemp	brown	0	NA	_48dold
female	_Htemp	brown	1	617	_48dold
female	_Htemp	brown	0	NA	_48dold
female	_Htemp	brown	1	1545	_48dold
female	_Htemp	brown	0	NA	_48dold
female	_Htemp	brown	1	1655	_48dold
female	_Htemp	brown	1	2908	_48dold
female	_Htemp	brown	1	568	_48dold
female	_Htemp	brown	1	1568	_48dold
female	_Htemp	brown	1	18053	_48dold
female	_Htemp	brown	0	NA	_48dold
female	_Htemp	brown	0	NA	_48dold
female	_Htemp	brown	1	416	_48dold
female	_Htemp	brown	0	NA	_48dold
female	_Htemp	brown	0	NA	_48dold
female	_Htemp	brown	1	448	_48dold
female	_Htemp	brown	1	329	_48dold
